# Supplementary material
Source: PubMed Central journal article supplement (PMC3303611)
Supplement: NIHMS358073-supplement-1_si_001.pdf [file NIHMS358073-supplement-1_si_001.pdf]

Supporting Information

**Radiosynthesis and evaluation of an  $^{18}\text{F}$ -labeled positron emission tomography (PET) radioligand for brain histamine subtype-3 receptors based on a non-imidazole 2-aminoethylbenzofuran chemotype**

Xiaofeng Bao, Shuiyu Lu, Jieh-San Liow, Sami S. Zoghbi, Kimberly J. Jenko, David T. Clark, Robert L. Gladding, Robert B. Innis, Victor W. Pike\*

Molecular Imaging Branch, National Institute of Mental Health, National Institutes of Health, 10 Center Drive, Room B3C346A, Bethesda, Maryland, 20892-1003, United States

| <u>Table of contents</u>                                                                        | Page |
|-------------------------------------------------------------------------------------------------|------|
| An example of HPLC chromatograms from the separation of [ $^{18}\text{F}$ ] <b>9</b> .          | S2   |
| Example of chromatograms from the reverse phase HPLC analysis of [ $^{18}\text{F}$ ] <b>9</b> . | S3   |

An example of HPLC chromatograms from the separation of [ $^{18}\text{F}$ ]9.

(a) Radioactivity detection

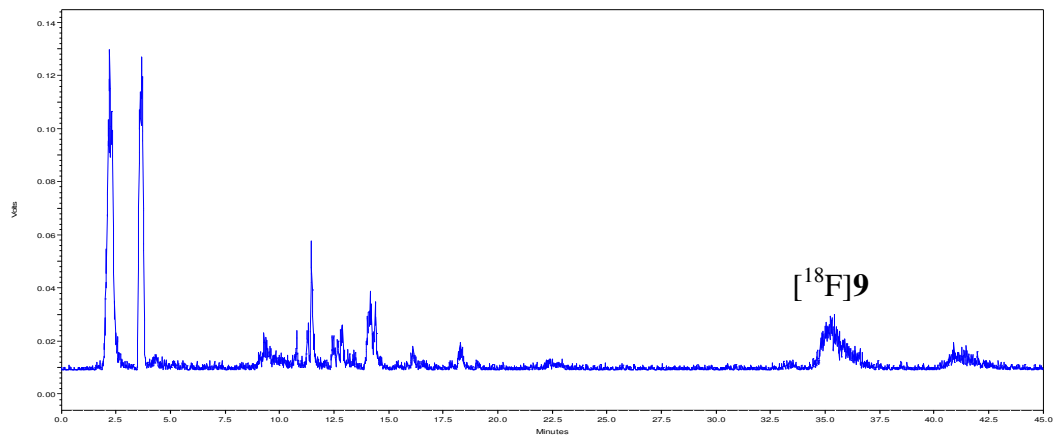

(b) Absorbance detection ( $\lambda = 243 \text{ nm}$ )

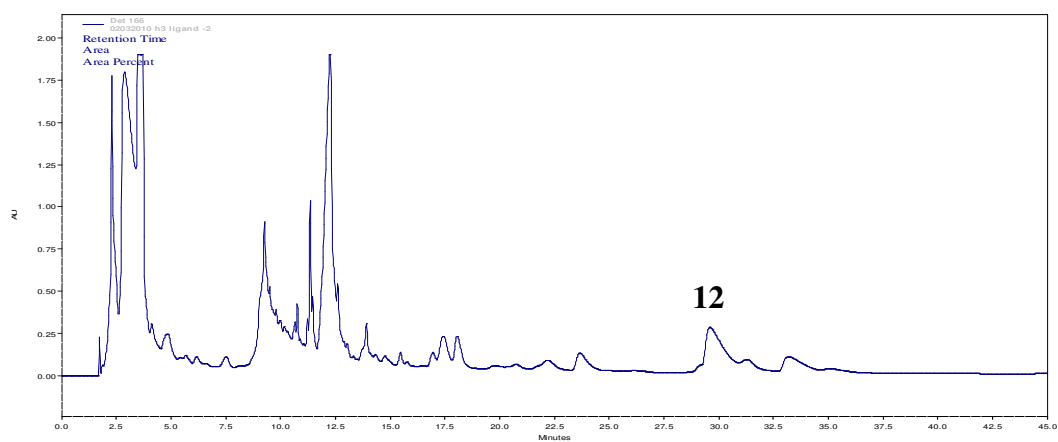

Separation was performed with HPLC on a Prodigy column (10  $\mu\text{m}$ , 10 mm  $\times$  250 mm; Phenomenex) eluted at 6 mL/min with a mixture of aq.  $\text{NH}_4\text{OH}$  (0.025%, pH 8.5) (A, 70%) and MeCN (B, 30%). B was kept at 30% for 5 min, linearly increased to 70% over 3 min, and then held at 70% for 45 min.

Example of chromatograms from the reverse phase HPLC analysis of [<sup>18</sup>F]9.

(a) Radioactivity detection

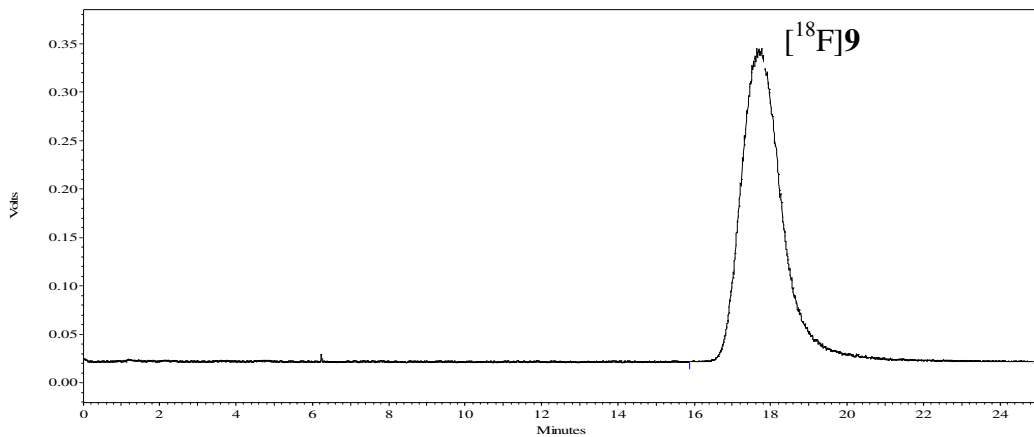

(b) Absorbance detection ( $\lambda = 243$  nm)

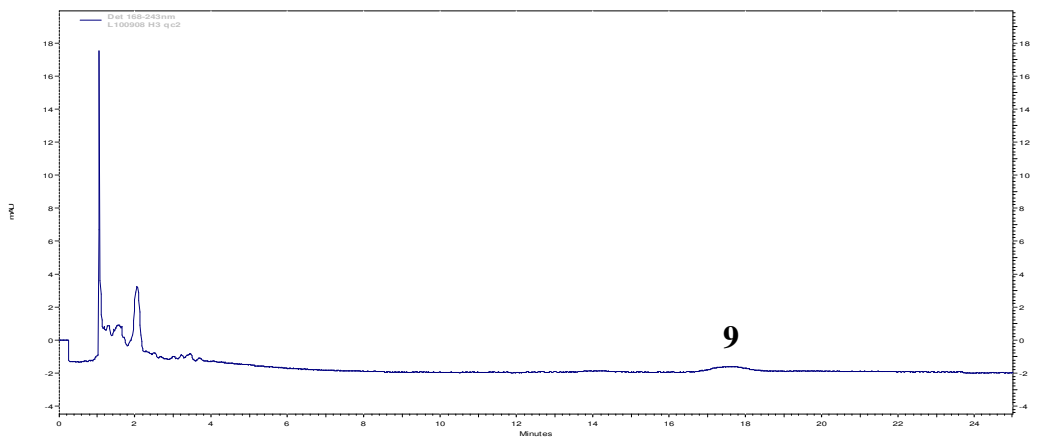

Analysis was performed with HPLC on a Prodigy column (10  $\mu$ m, 4.6 mm  $\times$  250 mm; Phenomenex) eluted with a mixture of aq. NH<sub>4</sub>OH (0.025%, pH 8.5) and MeCN (20: 80 v/v) at 2 mL/min with eluate monitored for absorbance at 243 nm (Gold 166 detector, Beckman) and for radioactivity (PMT, HC-003; Bioscan Inc, Washington DC).
